# Supplementary material for: Reduced titania@layered double hydroxide hybrid photoanodes for enhanced photoelectrochemical water oxidation
Source: Royal Society of Chemistry journal article supplement (doi:10.1039/c7ta00770a), 2017-01-01
Supplement: c7ta00770a1.pdf [file c7ta00770a1.pdf]

*Supporting Information for*

**Reduced Titania@Layered Double Hydroxide Hybrid Photoanode for Enhanced  
Photoelectrochemical Water Oxidation**

Jian Guo,<sup>1</sup> Chengyu Mao,<sup>2</sup> RuiKang Zhang,<sup>1</sup> Mingfei Shao<sup>\*1</sup>, Min Wei<sup>1</sup> and Pingyun Feng<sup>\*2</sup>

<sup>1</sup> State Key Laboratory of Chemical Resource Engineering, Beijing University of Chemical Technology, Beijing 100029, P. R. China

E-mail: shaomf@mail.buct.edu.cn

<sup>2</sup> Department of Chemistry, University of California - Riverside, CA 92521, USA

E-mail: pingyun.feng@ucr.edu

**Experimental Details**

**Oxygen detection:** The measurement of the photoelectrochemically generated O<sub>2</sub> was carried out in a home-made airtight transparent electrochemical cell using a three-electrode configuration connected with the electrochemical workstation (CHI 660C, CH Instruments Inc., Shanghai). The illumination geometrical area of the photoanode was ~0.54 cm<sup>2</sup>. PEC water oxidation measurements were performed in a 1.0 M KOH aqueous solution using bulk electrolysis method at 1.23 V vs. RHE under an illumination of 150 W Xe lamp (100 mW cm<sup>-2</sup>). Prior to the measurement, the electrolyte was thoroughly degassed by purging argon for 30 min. The formation of O<sub>2</sub> was detected by injecting the gas into a gas chromatograph (GC-7890II; Techcomp. Co., Ltd.) equipped with a semicapillary column and a thermal conductivity detector (TCD).

## Supplementary Figures

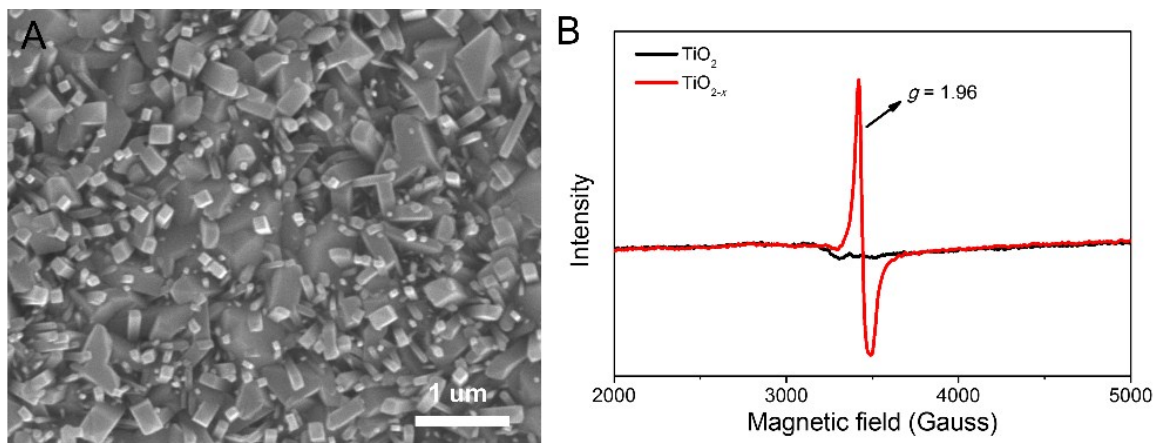

**Figure S1.** (A) Typical SEM image and (B) ESR spectra of Ti- $\text{TiO}_2$  and Ti- $\text{TiO}_{2-x}$ .

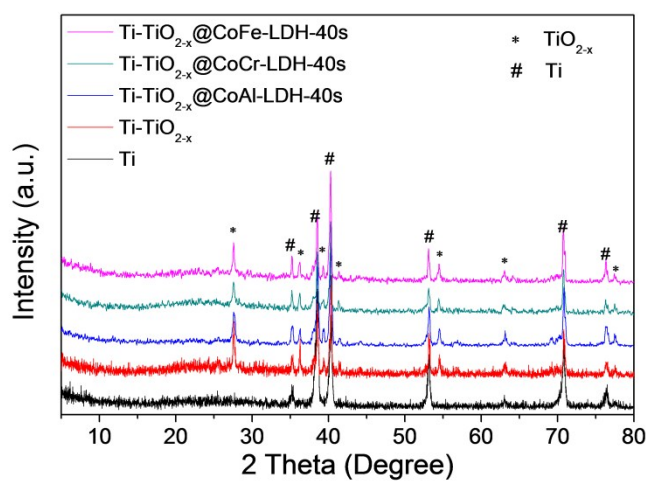

**Figure S2.** XRD patterns of Ti foil, Ti- $\text{TiO}_{2-x}$ , Ti- $\text{TiO}_{2-x}$ @CoAl-LDH-40s, Ti- $\text{TiO}_{2-x}$ @CoCr-LDH-40s and Ti- $\text{TiO}_{2-x}$ @CoFe-LDH-40s.

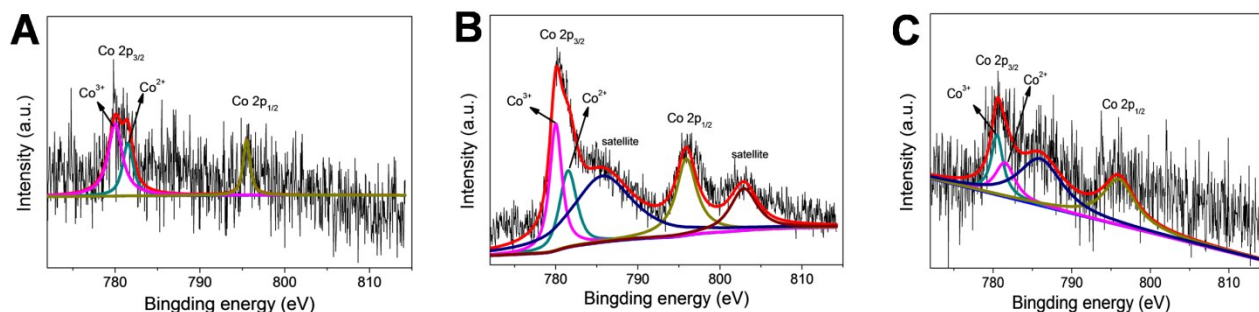

**Figure S3.** Co 2p XPS spectra of (A) Ti-TiO<sub>2-x</sub>@CoAl-LDH-40s, (B) Ti-TiO<sub>2-x</sub>@CoCr-LDH-40s, and (C) Ti-TiO<sub>2-x</sub>@CoFe-LDH-40s, respectively.

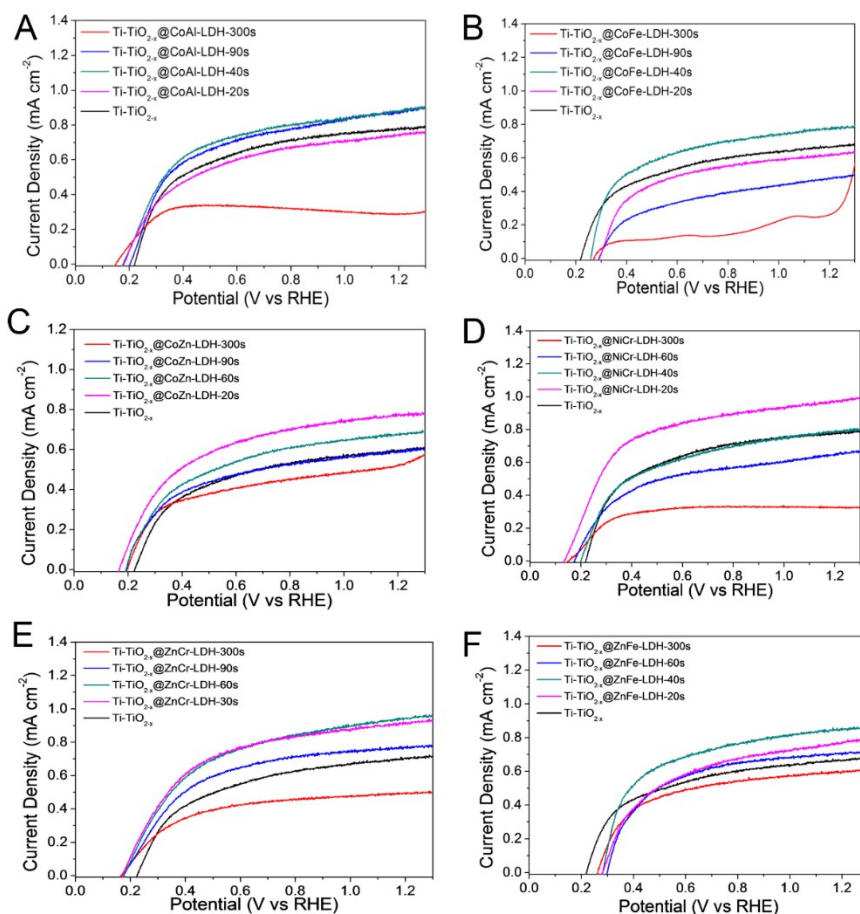

**Figure S4.** Current-Potential ( $J$ - $E$ ) curves of Ti-TiO<sub>2-x</sub> and Ti-TiO<sub>2-x</sub>@LDH respectively modified with different amount of (A) CoAl-LDH, (B) CoFe-LDH, (C) CoZn-LDH, (D) NiCr-LDH, (E) ZnCr-LDH and (F) ZnFe-LDH.

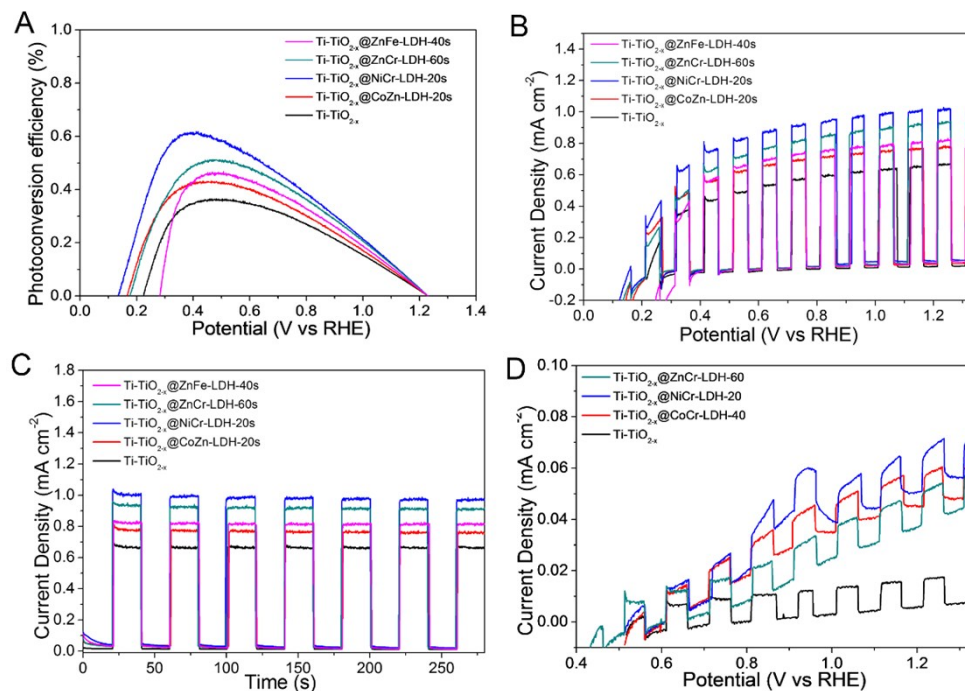

**Figure S5.** (A) calculated photoconversion efficiency, (B)  $J$ - $E$  behavior and (C) amperometric Current-Time ( $J$ - $T$ ) curves at a potential of 1.23 V (vs. RHE) under chopped light illumination for the samples of Ti-TiO<sub>2-x</sub>@LDH; (D)  $J$ - $E$  behavior under the chopped visible light ( $\lambda \geq 400$  nm) illumination for the samples of Ti-TiO<sub>2-x</sub>, and Ti-TiO<sub>2-x</sub>@Cr-based LDH.

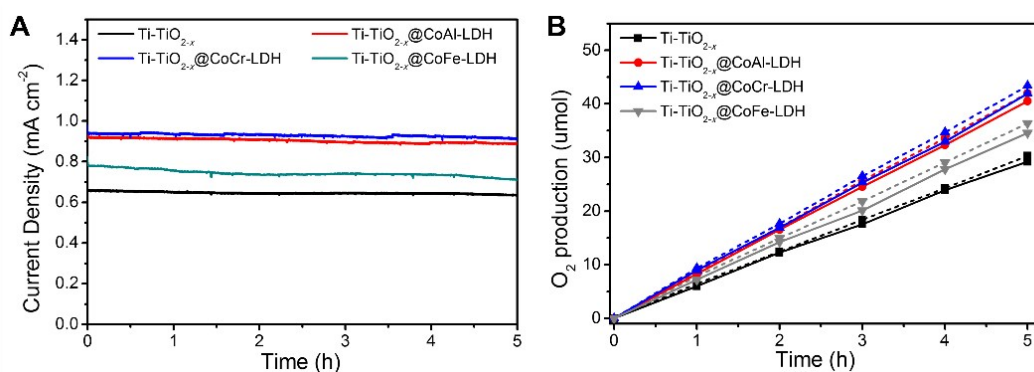

**Figure S6.** (A) The measured  $J$ - $T$  curves at a potential of 1.23 V (vs. RHE), and (B) Total O<sub>2</sub> production detected by a gas chromatograph (the dashed lines are the theoretical O<sub>2</sub> production

calculated from the measured photocurrent density assuming 100% faradaic efficiency) for  $\text{Ti-TiO}_{2-x}$ ,  $\text{Ti-TiO}_{2-x}@\text{CoAl-LDH}$ ,  $\text{Ti-TiO}_{2-x}@\text{CoCr-LDH}$ , and  $\text{Ti-TiO}_{2-x}@\text{CoFe-LDH}$ .

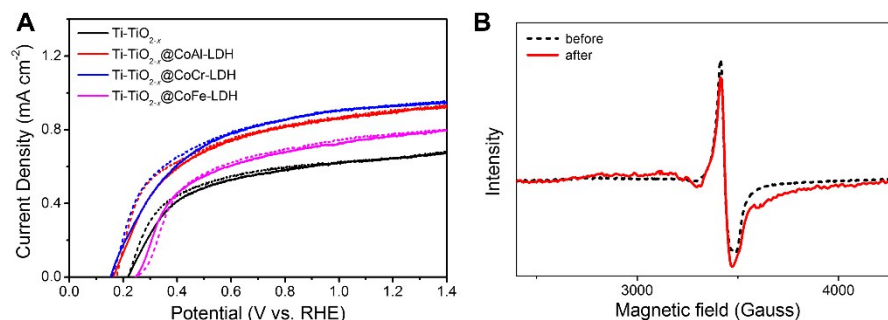

**Figure S7.** (A)  $J$ - $E$  curves before (the dashed lines) and after 5 h PEC tests for  $\text{Ti-TiO}_{2-x}$ ,  $\text{Ti-TiO}_{2-x}@\text{CoAl-LDH}$ ,  $\text{Ti-TiO}_{2-x}@\text{CoCr-LDH}$ , and  $\text{Ti-TiO}_{2-x}@\text{CoFe-LDH}$ , respectively; (B) ESR spectra of  $\text{Ti-TiO}_{2-x}$  before and after PEC measurement.

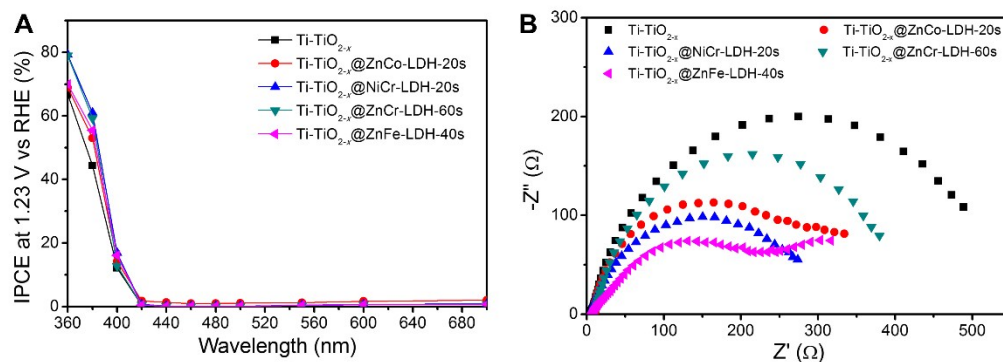

**Figure S8.** (A) IPCEs measured at an applied voltage of 1.23 V (vs. RHE), and (B) electrochemical impedance spectra (EIS) measured at the open circuit potential under illumination for the samples of  $\text{Ti-TiO}_{2-x}$ ,  $\text{Ti-TiO}_{2-x}@\text{ZnCo-LDH-20s}$ ,  $\text{Ti-TiO}_{2-x}@\text{NiCr-LDH-20s}$ ,  $\text{Ti-TiO}_{2-x}@\text{ZnCr-LDH-60s}$  and  $\text{Ti-TiO}_{2-x}@\text{ZnFe-LDH-40s}$ .

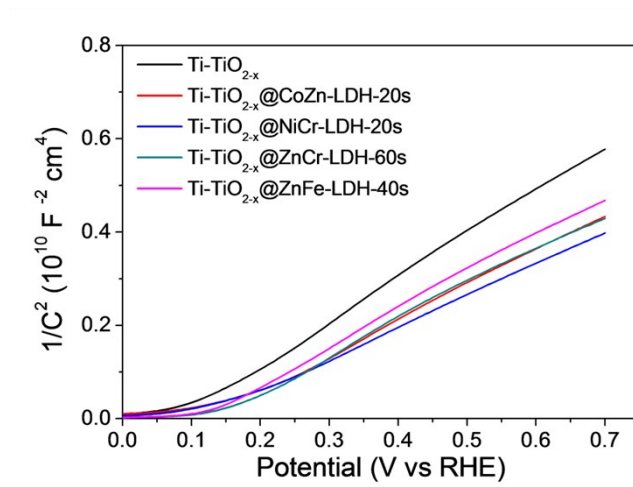

**Figure S9.** Mott-Schottky plots collected at a frequency of 5 kHz in the dark for the samples of Ti-TiO<sub>2-x</sub>@CoZn-LDH-20s, (B) Ti-TiO<sub>2-x</sub>@NiCr-LDH-20s, (C) Ti-TiO<sub>2-x</sub>@ZnCr-LDH-60s and (D) Ti-TiO<sub>2-x</sub>@ZnFe-LDH-40s comparing with Ti-TiO<sub>2-x</sub>.

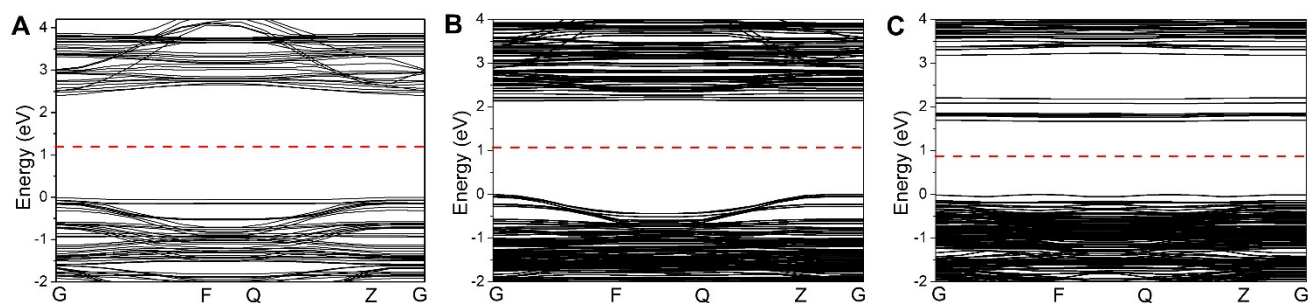

**Figure S10.** The band structure of (A) CoAl-LDH, (B) CoCr-LDH, and (C) CoFe-LDH, respectively.

The red dashed line represents the Fermi level. The energy of CB minimum and VB maximum are calculated by the equations  $E_{CB} = -W + 0.5E_g$  and  $E_{VB} = -W + 0.5E_g$ , respectively.

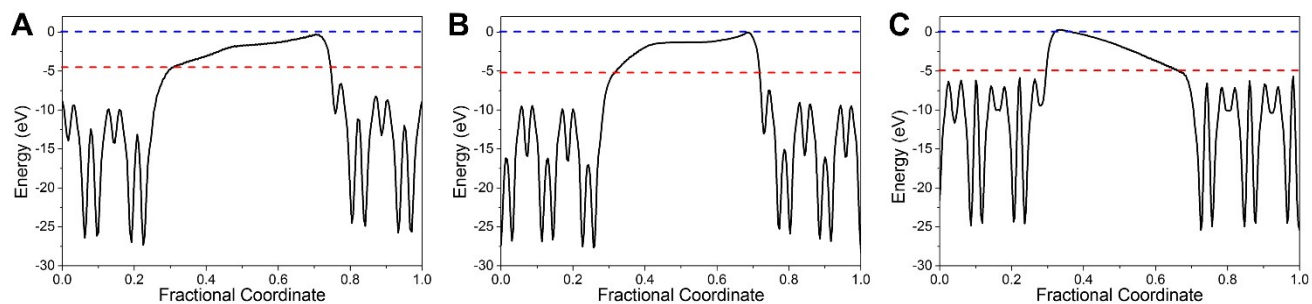

**Figure S11.** The work function of (A) CoAl-LDH, (B) CoCr-LDH, and (C) CoFe-LDH, respectively.

The blue dashed line represents the vacuum level and the red dashed line represents the Fermi level.
